# Supplementary material
Source: PubMed Central journal article supplement (PMC2897373)
Supplement: supp_78_7_3226__1.pdf [file supp_78_7_3226__1.pdf]

**Leo *et al.*: A first analysis of a bacterial collagen-binding protein with the collagen Toolkits: the promiscuous binding of YadaA to collagens may explain how it interferes with host processes**

**SUPPLEMENTARY MATERIAL**

**Synthesis of cyclic GPO peptides.**

The cyclo(GPO)<sub>n</sub> peptides were synthesized from linear precursors off-resin. The linear PO(*t*-Bu)(GPO(*t*-Bu))<sub>n-1</sub>G-OH peptides were synthesized as above (0.1 mmol scale) except that they were synthesized as C-terminal acids using the Tentagel R Trt-Gly Fmoc resin (0.17 mmol/g, Rapp Polymere). Cleavage of the side-chain protected peptides from the resin was carried out by repeated treatment with 1% trifluoroacetic acid in dichloromethane (8 ml, 2 mins, 8 times). A 10% solution of *N,N*-diisopropylamine in methanol was then carefully added to the previous reaction mixture. The resin was filtered and successively washed with dichloromethane (20 ml, twice), methanol (20ml, twice) and dichloromethane (20 ml, twice). The filtrate was concentrated under reduced pressure to *ca.* 1 ml volume, after which the crude peptides were precipitated with ice-cold ether. The filtered side-chain protected crude peptides were ether-washed (twice), dissolved in 10% acetonitrile in water, lyophilized and then purified by reverse phase high performance liquid chromatography as described in (36, 56) using a linear gradient of 5-45% acetonitrile in water. The pure peptides were then lyophilized.

Cyclization of the side-chain protected peptides (35 μmol) was carried out using HATU (2-(7-Aza-1H-benzotriazole-1-yl)-1,1,3,3-tetramethyluronium hexafluorophosphate, 3 eq.) and HOBt (N-Hydroxybenzotriazole, 3 eq) in dimethylformamide (15 ml) containing 1% *N,N*-diisopropylamine, overnight. The solvent was removed under reduced pressure and the resulting residue was dissolved in dichloromethane. The organic layer was then successively washed with water, a saturated solution of sodium carbonate, a 1 M solution of potassium hydrogen sulfate and water. Removal of the dichloromethane under reduced pressure gave the crude side-chain protected cyclic peptides. Side-chain deprotection was effected by treatment with a trifluoroacetic acid, water and triisopropylsilane mixture (95:2.5:2.5 v/v), for 1 h. The reaction mixture was then concentrated under reduced pressure to *ca.* 1 ml volume, after which the crude cyclic peptides were precipitated with ice-cold ether. The filtered crude cyclic peptides were ether-washed (twice), dissolved in 5% acetonitrile in water and then lyophilized. The crude cyclic peptides were purified, as described for the linear precursors, characterized by MALDI-TOF mass spectrometry, and then lyophilized.

**Supplementary Table 1**  
Sequences of Toolkit peptides

| Toolkit II |                              | Toolkit III |                             |
|------------|------------------------------|-------------|-----------------------------|
| Peptide    | Sequence <sup>a</sup>        | Peptide     | Sequence <sup>a</sup>       |
| II-1       | GPMGPMGPRGPOGPAGAOGPQGFQGNQ  | III-1       | GLAGYOGPAGPOGPOGPOGTSGHOGSO |
| II-2       | GPQGFQGNQGEQGEQGVSGPMGPRGPO  | III-2       | GTSGHOGSOGSOGYQGPOGEOGQAGPS |
| II-3       | GPMGPRGPOGPOGKOGDDGEAGKOGKA  | III-3       | GEOGQAGPSGPOGPOGAIGPSGPAGKD |
| II-4       | GEAGKOGKAGERGPOGPQGARGFOGTO  | III-4       | GPSGPAGKDGESGROGROGERGLOGPO |
| II-5       | GARGFOGTOGLOGVKGHRGYOGLDGAK  | III-5       | GERGLOGPOGIKGPAGIOGFOGMKGHR |
| II-6       | GYOGLDGAKGEAGAOGVKGESGSOGEN  | III-6       | GFOGMKGHRGFDGRNGEKGETGAOGLK |
| II-7       | GESGSOGENSOGPMGPRGLOGERGR    | III-7       | GETGAOGLKGENGLOGENGAOGPMGPR |
| II-8       | GLOGERGRTPAGAAGARGNDGQOGPA   | III-8       | GAOGPMGPRGAOGERGROGLOGAAGAR |
| II-9       | GNDGQOGPAGPOGPVGPAGGOGFOGAO  | III-9       | GLOGAAGARGNDGARGSDGQOGPOGPO |
| II-10      | GGOGFOGAOGAKGEAGPTGARGPEGAQ  | III-10      | GQOGPOGPOGTAGFOGSOGAKGEVGA  |
| II-11      | GARGPEGAQGPGEQGTGSOGPAGAS    | III-11      | GAKGEVGPAGSOGSNGAOGQRGEOGPQ |
| II-12      | GSOGPAGASNGOITDGIQAKGSAGAO   | III-12      | GQRGEOGPQGHAGAQQPOGPOGINGSO |
| II-13      | GAKGSAGAOGIAGAOGFOGPRGPOGPQ  | III-13      | GPOGINGSOGGKGMGPAGIOGAOGLM  |
| II-14      | GPRGPOGPQATGPLGPKGQTGEOGIA   | III-14      | GIOGAOGLMGARGPOGPAGANGAOLR  |
| II-15      | GQTGEOGIAGFKGEQGPKEGPOGPQ    | III-15      | GANGAOLRGGAGEOGKNGAKGEOGPR  |
| II-16      | GEOGPAGPQGAOGPAGEEGKRGARGEO  | III-16      | GAKGEOGPRGERGEAGIOGVOGAKGED |
| II-17      | GKRGARGEOGGVPIGPOGERGAOGR    | III-17      | GVOGAKGEDGKDGSOGEANGLOGAA   |
| II-18      | GERGAOGRGFOGQDGLAGPKGAOGER   | III-18      | GANGLOGAAGERGAOGRFPAGPNGIO  |
| II-19      | GPKGAOGERGPSGLAGPKGANGDOGRO  | III-19      | GPAGPNGIOGEKGPAGERGAOGPAGPR |
| II-20      | GANGDOGROGEOGLOGARGLTGROGDA  | III-20      | GAOGPAGPRGAAGEOGRDGVGGOGMR  |
| II-21      | GLTGROGDAGPQKVGPSGAOGEDGRO   | III-21      | GVOGGOGMRGMOGSOGGOGSDGKOGPO |
| II-22      | GAOGEDGROGPOGPQGARGQOGVMGFO  | III-22      | GSDGKOGPOGSQGESGROGPOGPSGR  |
| II-23      | GQOGVMGFOGPKGANGEQKAGEKGLQ   | III-23      | GPOGPSGRGQOGVMGFOGPKGNDGAO  |
| II-24      | GKAGEKLOGAOLRGLQKDGGETGAA    | III-24      | GPKGNDGAOGKNGERGGOGGOGPQGPQ |
| II-25      | GKDGGETGAAGPOGPAGPAGERGEQGAO | III-25      | GGOGPQGPQOGKNGETGPQGPQPTGPG |
| II-26      | GERGEQGAOGPSGFQGLQPOGPOGEG   | III-26      | GPOGPTGPGDKGDTGPOGPQGLQGLQ  |
| II-27      | GPOGPOGEGGKOGDQVQGEAGAOLV    | III-27      | GPQGLQGLQGTGGPOGENGKOGEOGPK |
| II-28      | GEAGAOLVGPGRGERGFOGERGSOQAQ  | III-28      | GKOGEOGPKGDAGAOGAOGGKGDAGA  |
| II-29      | GERGSOQAQGLQGPRLQGTGTDGPK    | III-29      | GGKGDAGAOGERGPOGLAGAOLRGG   |
| II-30      | GTOGTDGPKGASGPAGPOGAQGPQGLQ  | III-30      | GAOLRGGAGPOGPEGGKGAAGPOGPO  |
| II-31      | GAQGPQGLQGMGERGAAGIAGPKGDR   | III-31      | GAAGPOGPOGAAGTOGLQGMGERGGL  |
| II-32      | GIAGPKGDRGDVGEKGPEGAOGKDGGR  | III-32      | GMOGERGGLGSOGPKGDKGEOGGOGAD |
| II-33      | GAOGKDGGRGLTGPIGPOGPAGANGEK  | III-33      | GEOGGOGADGVOGKDGPRGPTGPIGPO |

|       |                               |        |                              |
|-------|-------------------------------|--------|------------------------------|
| II-34 | GPAGANGEKGEVGPAGSAGARGAO      | III-34 | GPTGPIGPOGPAGQOGDKGEGGAOGLO  |
| II-35 | GSAGARGAOGERGETGPOGPAGFAGPO   | III-35 | GEGGAOGLAGPRGSOGERGETGPO     |
| II-36 | GPAGFAGPOGADGQOGAKGEQGEAGQK   | III-36 | GERGETGPOGPAGFOGAOQNGEOGGK   |
| II-37 | GEQGEAGQKGEAGAOGPQGPSGAOGPQ   | III-37 | GQNGEOGGKGERGAOGEKGEGGPOGVA  |
| II-38 | GPSGAOGPQGPTGVTGPKGARGAQGPO   | III-38 | GEGGPOGVAGPOGGSPAGPOGPQGVK   |
| II-39 | GARGAQGPOGATGFOGAAGRVPPOGSN   | III-39 | GPOGPQGVKGERGSOGGOGAAGFOGAR  |
| II-40 | GRVGPPOGSNGNOGPOGPOGPSKDGPK   | III-40 | GAAGFOGARGLOGPOGSNGNOGPOGPS  |
| II-41 | GPSGKDGPKGARGDSGPOGRAGEOGLQ   | III-41 | GNOGPOGPSGSOGKDGPOGPAGNTGAO  |
| II-42 | GRAGEOGLQGPAGPOGEKGEODDGP     | III-42 | GPAGNTGAOGSOGVSGPKGDAGQOGEK  |
| II-43 | GEOGDDGPSGAEGPOGPQGLAGQRGIV   | III-43 | GDAGQOGEKGSOGAQGPOGAOGLPLGIA |
| II-44 | GLAGQRGIVGLOGQRGERGFOGLOGPS   | III-44 | GAOGLPLGIAGITGARGLAGPOGMOGPR |
| II-45 | GFOGLOGPSGEOGKQGAOGASGDRGPO   | III-45 | GPOGMOGPRGSOGPQGVKGESGKOGAN  |
| II-46 | GASGDRGPOGPVGPGLTGPAGEOGRE    | III-46 | GESGKOGANGLSGERGPOGPQGLGLA   |
| II-47 | GPAGEOGREGSOGADGPOGRDGAAGVK   | III-47 | GPQGLAGTAGEOGRDGNOSDGLA      |
| II-48 | GRDGAAGVKGDRGETGAVGAOGAOGPO   | III-48 | GNOGSDGLOGRDGSOGGKDRGENGSO   |
| II-49 | GAOGAOGPOGSOGPAGPTGKQGDREGEA  | III-49 | GDRGENGSOGAOGAOGHOGPOGPVGA   |
| II-50 | GKQGDREGEAGAQPMPGPSGPAGARGIQ  | III-50 | GPOGPVGPAGKSGDRGESGPAGPAGAO  |
| II-51 | GPAGARGIQGPQGPGRGDKGEAGEOGER  | III-51 | GPAGPAGAOGPAGSRGAOGPQGPGRGDK |
| II-52 | GEAGEOGERGLKGHRGFTGLQGLQLOGPO | III-52 | GPQGPGRGDKGETGERGAAGIKGHRGFO |
| II-53 | GLQGLQLOGPOGPSGDQASGPAGPSGPR  | III-53 | GIKGHRGFOGNOGAOGSOGPAGQQGAI  |
| II-54 | GPAGPSGPRGPOGPVGPSPKDGANGIO   | III-54 | GPAGQQGAIGSOGPAGPRGPVGPSPGPO |
| II-55 | GKDGANGIOGPIGPOGPRGRSGETGPA   | III-55 | GPVGPSPGPOGKDGTSGHOGPIGPOGPR |
| II-56 | GPRGRSGETGPAGPOGNOGPOGPOGPO   | III-56 | GPIGPOGPRGNRGERGSEGSOGHOGQO  |
|       |                               | III-57 | GERGSEGSOGHOGQOGPOGPOGAOGPC  |

<sup>a</sup>Flanking GPC-(GPP)<sub>5</sub> sequences are not shown

## Supplementary Table 2

Melting temperatures of GPO6 peptides as measured by polarimetry.

| Peptide  | T <sub>m</sub> |
|----------|----------------|
| GPO6a    | 73.3°C         |
| GPO6b    | 74.5°C         |
| GPO6c    | 74.1°C         |
| GPO6d    | 73.8°C         |
| GPO6e    | 73.0°C         |
| GPO6f    | 73.6°C         |
| GPO6g    | 73.9°C         |
| GPO6h    | 74.0°C         |
| GPO6i    | 74.1°C         |
| GPO6j    | 74.3°C         |
| GKO-GPO1 | 50.9°C         |
| GKO-GPO3 | 63.8°C         |
| GKO-GPO4 | 64.6°C         |
| GKO-GPO6 | 59.4°C         |

**Supplementary Table 3**

ERGET-like motifs in Toolkit peptides

| Peptide | Motif | Binding class | Peptide | Motif | Binding class |
|---------|-------|---------------|---------|-------|---------------|
| II-7    | ERGRT | Non-binder    | III-4   | KDGES | Medium binder |
| II-8    | ERGRT | Non-binder    | III-11  | QRGEO | Low binder    |
| II-24   | KDGET | Non-binder    | III-12  | QRGEO | High binder   |
| II-25   | KDGET | Low binder    | III-15  | AKGEO | Low binder    |
| II-25   | ERGEQ | Low binder    | III-16  | ERGEA | Non-binder    |
| II-26   | ERGEQ | High binder   | III-16  | AKGED | Non-binder    |
| II-32   | DRGDV | Non-binder    | III-17  | AKGED | Non-binder    |
| II-34   | EKGEV | Non-binder    | III-25  | KNGET | Medium binder |
| II-35   | ERGET | High binder   | III-26  | DKGDT | High binder   |
| II-36   | EQGEA | Non-binder    | III-32  | DKGEO | Non-binder    |
| II-42   | EKGEO | Low binder    | III-34  | DKGEG | Medium binder |
| II-44   | QRGER | Medium binder | III-35  | ERGET | Non-binder    |
| II-48   | DRGET | Medium binder | III-36  | ERGET | Low binder    |
| II-49   | DRGEA | Medium binder | III-37  | EKGEG | Non-binder    |
| II-50   | DRGEA | Non-binder    | III-45  | VKGES | Low binder    |
| II-51   | DKGEA | Non-binder    | III-48  | DRGEN | Non-binder    |
| II-56   | RSGET | High binder   | III-49  | DRGEN | Medium binder |
|         |       |               | III-56  | NRGER | Low binder    |
|         |       |               | III-57  | ERGSE | Medium binder |

### Supplementary Table 4

Correlations of amino acid content of Toolkit peptides to YadA binding<sup>a</sup>.

| Amino Acid     | Toolkit II (N=56) |               |                   | Toolkit III (N=55) |               |                 | Toolkit II & III (N=111) |               |                   |
|----------------|-------------------|---------------|-------------------|--------------------|---------------|-----------------|--------------------------|---------------|-------------------|
|                | # <sup>b</sup>    | Correlation   | <i>p</i> -value   | # <sup>b</sup>     | Correlation   | <i>p</i> -value | # <sup>b</sup>           | Correlation   | <i>p</i> -value   |
| Alanine        | 159               | -0.195        | 0.150             | 133                | -0.006        | 0.963           | 292                      | -0.105        | 0.272             |
| Arginine       | 84                | -0.063        | 0.641             | 63                 | -0.177        | 0.195           | 147                      | -0.117        | 0.220             |
| Asparagine     | 20                | -0.090        | 0.509             | 33                 | 0.010         | 0.943           | 53                       | -0.029        | 0.764             |
| Aspartic acid  | 44                | -0.262        | 0.051             | 34                 | -0.132        | 0.336           | 78                       | <u>-0.201</u> | <u>0.034</u>      |
| Glutamic acid  | 84                | -0.153        | 0.209             | 64                 | <u>-0.409</u> | <u>0.002</u>    | 148                      | <u>-0.268</u> | <u>0.004</u>      |
| Glutamine      | 58                | 0.0952        | 0.444             | 38                 | 0.067         | 0.629           | 96                       | 0.074         | 0.421             |
| Glycine        | 511               | 0.170         | 0.426             | 524                | -0.211        | 0.121           | 1035                     | -0.063        | 0.517             |
| Histidine      | 2                 | 0.057         | 0.676             | 9                  | 0.164         | 0.231           | 11                       | 0.119         | 0.212             |
| Hydroxyproline | 168               | <u>0.559</u>  | <u>&lt;0.0001</u> | 210                | <u>0.320</u>  | <u>0.017</u>    | 378                      | <u>0.420</u>  | <u>&lt;0.0001</u> |
| Isoleucine     | 15                | -0.231        | 0.087             | 21                 | 0.038         | 0.781           | 36                       | -0.085        | 0.376             |
| Leucine        | 36                | -0.022        | 0.871             | 36                 | 0.080         | 0.563           | 72                       | 0.049         | 0.604             |
| Lysine         | 56                | <u>-0.523</u> | <u>&lt;0.0001</u> | 50                 | <u>-0.495</u> | <u>0.0001</u>   | 106                      | <u>-0.511</u> | <u>&lt;0.0001</u> |
| Methionine     | 9                 | -0.140        | 0.303             | 14                 | 0.017         | 0.904           | 23                       | 0.0771        | 0.421             |
| Phenylalanine  | 19                | <u>0.420</u>  | <u>0.001</u>      | 8                  | 0.075         | 0.588           | 27                       | <u>0.270</u>  | <u>0.004</u>      |
| Proline        | 150               | 0.217         | 0.108             | 152                | <u>0.306</u>  | <u>0.023</u>    | 302                      | <u>0.258</u>  | <u>0.006</u>      |
| Serine         | 43                | -0.049        | 0.720             | 56                 | 0.061         | 0.657           | 99                       | 0.010         | 0.915             |
| Threonine      | 29                | -0.045        | 0.745             | 19                 | 0.236         | 0.083           | 48                       | 0.074         | 0.443             |
| Tyrosine       | 2                 | -0.126        | 0.352             | 2                  | <u>0.277</u>  | <u>0.040</u>    | 4                        | 0.063         | 0.510             |
| Valine         | 23                | 0.104         | 0.444             | 18                 | -0.164        | 0.232           | 41                       | -0.016        | 0.870             |

<sup>a</sup>Correlations at higher than the 0.05 significance level are underlined

<sup>b</sup>The total number of this type of residue in the Toolkit peptides

**Supplementary Table 5**

Occurrences of common X-X' dipeptides in the 15 highest and lowest-binding Toolkit peptides<sup>a</sup>

| Dipeptide | Occurrence in high binders | Occurrence in low binders | Expected occurrence based on Toolkit frequencies | Expected occurrence based on frequencies in collagens <sup>b</sup> |
|-----------|----------------------------|---------------------------|--------------------------------------------------|--------------------------------------------------------------------|
| AA        | 3                          | 3                         | 2.38                                             | 1.215                                                              |
| AK        | 0                          | 2                         | 1.39                                             | 1.62                                                               |
| AN        | 0                          | 4                         | 1.39                                             | 0.405                                                              |
| AO        | 7                          | 11                        | 8.52                                             | 4.59                                                               |
| AQ        | 1                          | 1                         | 1.39                                             | 0.54                                                               |
| AR        | 5                          | 1                         | 2.97                                             | 1.485                                                              |
| DK        | 1                          | 2                         | 0.99                                             | 1.35                                                               |
| DR        | 1                          | 3                         | 1.19                                             | 3.645                                                              |
| EA        | 1                          | 3                         | 1.78                                             | 1.62                                                               |
| EK        | 0                          | 6                         | 1.59                                             | 3.375                                                              |
| EN        | 0                          | 1                         | 0.99                                             | 0.405                                                              |
| EO        | 2                          | 5                         | 4.56                                             | 3.78                                                               |
| ER        | 5                          | 5                         | 4.96                                             | 3.645                                                              |
| ES        | 1                          | 0                         | 0.99                                             | 0.405                                                              |
| ET        | 3                          | 1                         | 1.59                                             | 0.81                                                               |
| FO        | 4                          | 1                         | 2.78                                             | 3.375                                                              |
| GO        | 1                          | 1                         | 1.39                                             | 0.405                                                              |
| IA        | 0                          | 2                         | 0.99                                             | 0.54                                                               |
| IO        | 0                          | 2                         | 1.19                                             | 2.025                                                              |
| KD        | 1                          | 4                         | 1.78                                             | 0.675                                                              |
| KO        | 0                          | 0                         | 1.19                                             | 1.89                                                               |
| LA        | 2                          | 1                         | 1.39                                             | 0.675                                                              |
| LO        | 8                          | 4                         | 3.77                                             | 7.425                                                              |
| LQ        | 2                          | 1                         | 1.19                                             | 0.945                                                              |
| NO        | 3                          | 1                         | 1.39                                             | 0.945                                                              |
| PA        | 7                          | 8                         | 7.53                                             | 4.59                                                               |
| PI        | 0                          | 1                         | 0.99                                             | 1.215                                                              |
| PK        | 0                          | 4                         | 2.58                                             | 3.645                                                              |
| PM        | 2                          | 0                         | 1.19                                             | 0.54                                                               |
| PO        | 25                         | 8                         | 14.47                                            | 14.175                                                             |
| PQ        | 4                          | 3                         | 3.57                                             | 3.375                                                              |
| PR        | 2                          | 3                         | 3.96                                             | 3.51                                                               |
| PS        | 4                          | 3                         | 3.17                                             | 1.89                                                               |
| PT        | 1                          | 0                         | 0.99                                             | 1.08                                                               |
| PV        | 1                          | 1                         | 0.99                                             | 1.755                                                              |
| QO        | 3                          | 1                         | 1.59                                             | 1.485                                                              |
| RO        | 3                          | 0                         | 1.39                                             | 1.485                                                              |
| SO        | 2                          | 4                         | 4.96                                             | 3.105                                                              |
| VK        | 1                          | 1                         | 0.99                                             | 0.675                                                              |

<sup>a</sup>15 highest-binding peptides: II-1, II-9; II-26, II-56, II-35, II-48, II-22, II-44, II-52, III-1, III-9, III-40, III-12, III-26, III-4

15 lowest-binding peptides: II-24, II-23, II-31, II-47, II-34, II-33, II-54, II-37, III-32, III-37, III-29, III-32, III-48, III-51

<sup>b</sup>expected frequencies from (42)



**Supplementary Table 6**

Significant correlations for dipeptides in Toolkit peptides with YadA binding (N=111).

| Position | Dipeptide | Correlation | <i>p</i> -value       |
|----------|-----------|-------------|-----------------------|
| G-X      |           |             |                       |
|          | GF        | 0.200       | 0.034                 |
|          | GP        | 0.272       | 0.003                 |
|          | GE        | -0.286      | 0.002                 |
| X- X'    |           |             |                       |
|          | FQ        | 0.303       | 0.001                 |
|          | EK        | -0.290      | 0.002                 |
|          | PK        | -0.30203    | 0.001                 |
|          | PO        | 0.47678     | $9.3 \times 10^{-8}$  |
| X'-G     |           |             |                       |
|          | KG        | -0.39248    | $1.71 \times 10^{-5}$ |
|          | OG        | 0.27531     | 0.003164              |

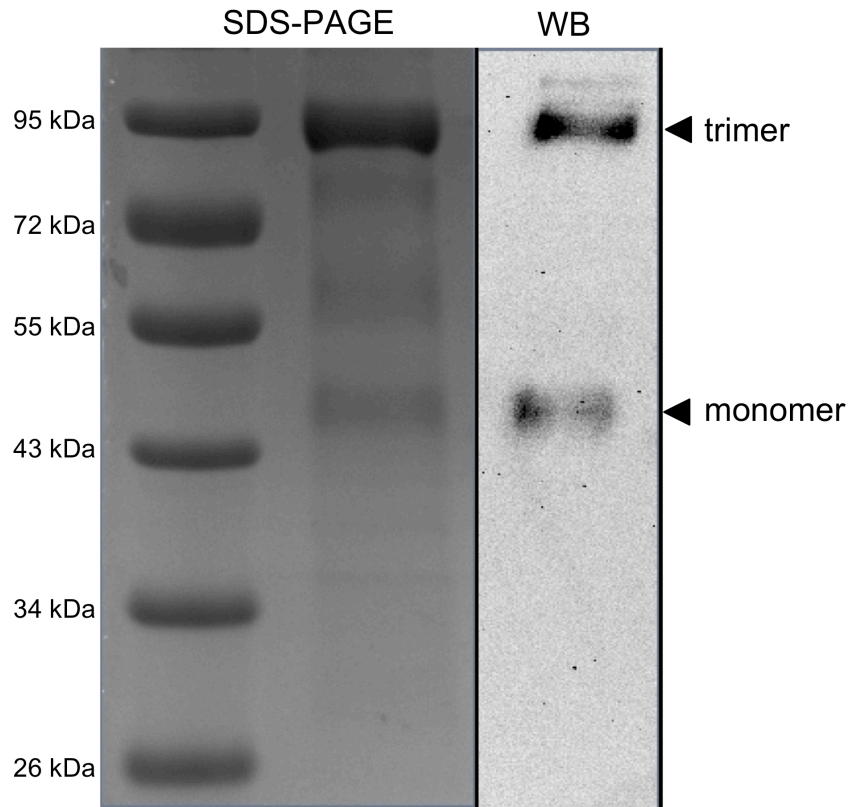

**Supplementary Figure 1.**  $YadA_{24-378}$  is trimeric. 5  $\mu\text{g}$  of purified  $YadA_{24-378}$  was heated for 10 minutes in non-reducing sample buffer and subjected to SDS-PAGE (left panel). Most of the protein is still trimeric, which migrates somewhat anomalously. The identity of the protein was confirmed by Western blot using the  $YadA$ -specific antibody 3G12 (right panel).

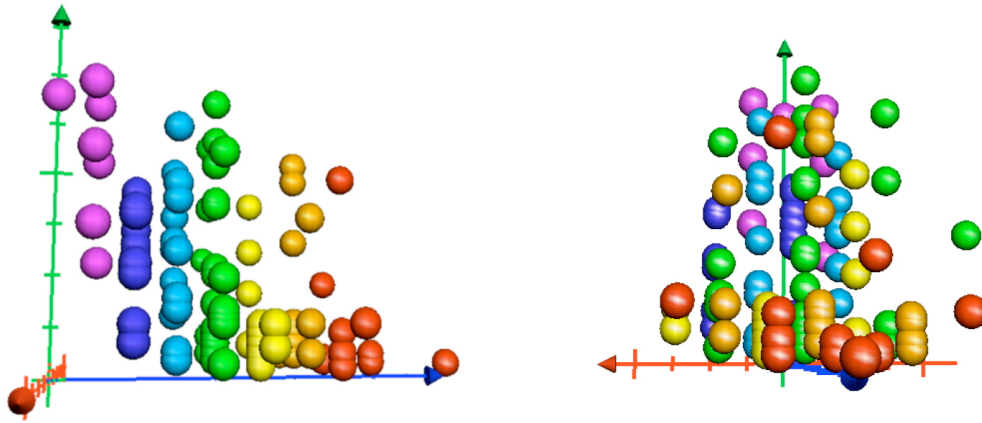

**Supplementary Figure 2.** 3-dimensional scatter plot of the effect of the number of charged residues and net charge of the Toolkit peptides on binding response. The green axis shows the binding response ( $A_{450}$ ), the blue axis the number of charged residues and the red axis the net charge of the peptide. To aid interpretation, the points are coloured according to the number of charged residues in the peptide: purple 0-1 charges, dark blue 2 charges, light blue 3 charges, green 4 charges, yellow 5 charges, orange 6 charges, red 7-10 charges. When comparing points with the same number of charges, on average those with a net charge of  $0 \pm 1$  give a higher binding response than those with a higher absolute charge. The magnitude of absolute charge also decreases the binding response, *i.e.* peptides with a smaller absolute charge tend to bind YadA better than those with a larger absolute charge. This suggests that neutralising charges can compensate to some degree for the number of charged residues, which have an inhibitory effect on YadA binding.

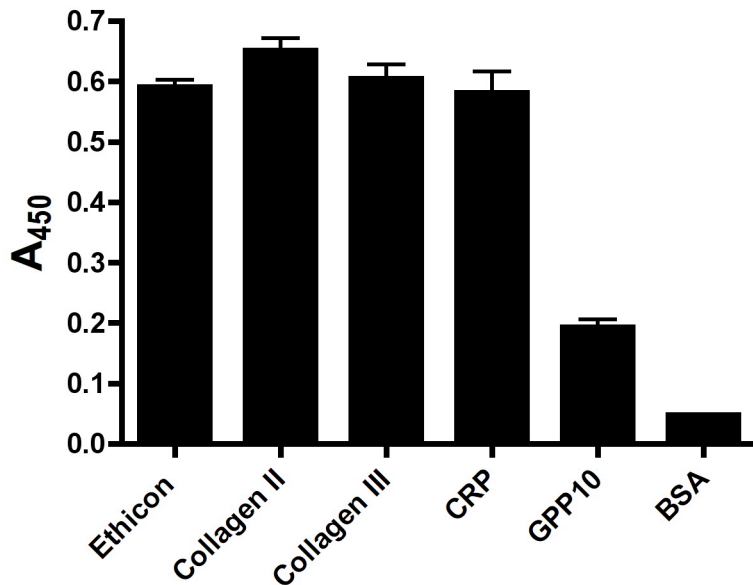

**Supplementary Figure 3.** Binding of YadA to collagens and CRP by SPBA. Ethicon collagen is a fibrous form of collagen type I. Collagens type II and type III are monomeric. CRP is a cross-linked GPO-containing peptide, and GPP10 is a control peptide. Binding to BSA shows background levels. The columns show the mean absorbance at 450 nm from three replicate wells; error bars denote standard errors of mean. YadA bound as strongly to this as to monomeric collagens type II and type III. Additionally, YadA bound to CRP at a similar level. This was expected, as CRP is composed of cross-linked GCO-(GPO)<sub>10</sub>-GCOG peptides, and YadA is known to bind strongly to the peptide (POG)<sub>10</sub> (30).

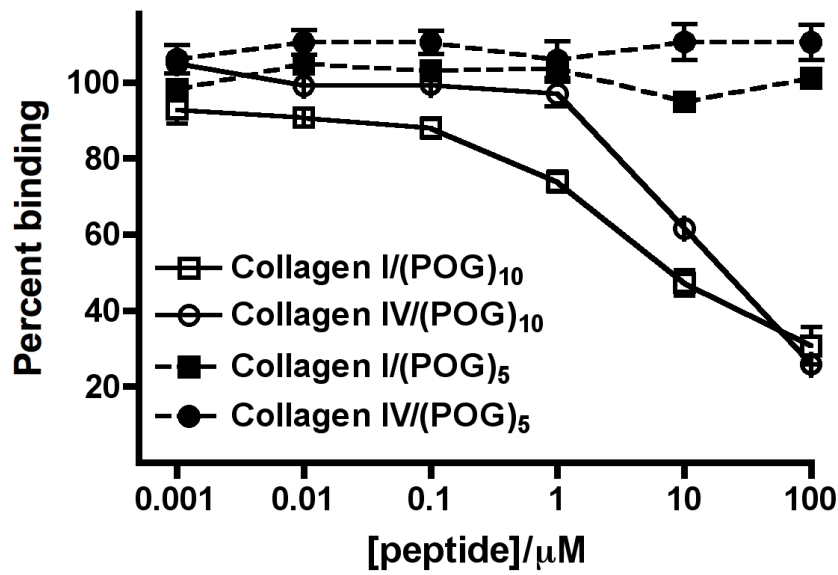

**Supplementary Figure 4.** (POG)<sub>10</sub> blocks the binding of YadA to collagen type I and type IV. Blocking experiments were carried out using SPBA. Wells of Immulon 2HB plates were coated with either collagen type I or collagen type IV as described for SPBA in Materials and Methods. YadA was diluted to 10  $\mu\text{g/ml}$  in adhesion buffer to which (POG)<sub>10</sub> or (POG)<sub>5</sub> were added at concentrations between 0 and 100  $\mu\text{M}$  per trimer. These solutions were incubated at RT for 30 minutes before use. After blocking the wells with BSA as above, we added 100  $\mu\text{l}$  of the YadA-peptide solutions and incubated for 1 hour. The procedure after this was as for SPBA above. For analysis, we took wells incubated without POG peptides as 100% of binding, and the background level represented by BSA as 0%. Binding levels were calculated as follows:  $P = [(S_{\text{col}} - S_{\text{BSA}}) \times (S_{\text{POG}} - S_{\text{BSA}})] \times 100\%$ , where  $P$  is the percentage of binding, and  $S_{\text{col}}$ ,  $S_{\text{POG}}$  and  $S_{\text{BSA}}$  the signals given by collagen without added peptide, the signal given at a given peptide concentration and the signal from BSA, respectively.

The results for collagen type I (squares) and collagen type IV (circles) are shown above. (POG)<sub>10</sub> (open symbols and continuous curves) blocked the binding of YadA to collagen type I at concentrations of 1  $\mu\text{M}$  or higher (Figure 7). (POG)<sub>10</sub> also blocked binding to collagen type IV, yielding a similar inhibition curve as for collagen type I. (POG)<sub>5</sub> (filled symbols and dashed curves), which is not triple-helical, did not block the interaction to either collagen at any of the assayed concentrations. Though these results do not exclude the possibility that YadA binds specifically to the 7sL fragment, they do suggest that YadA binds to triple-helical regions in collagen type IV as well.

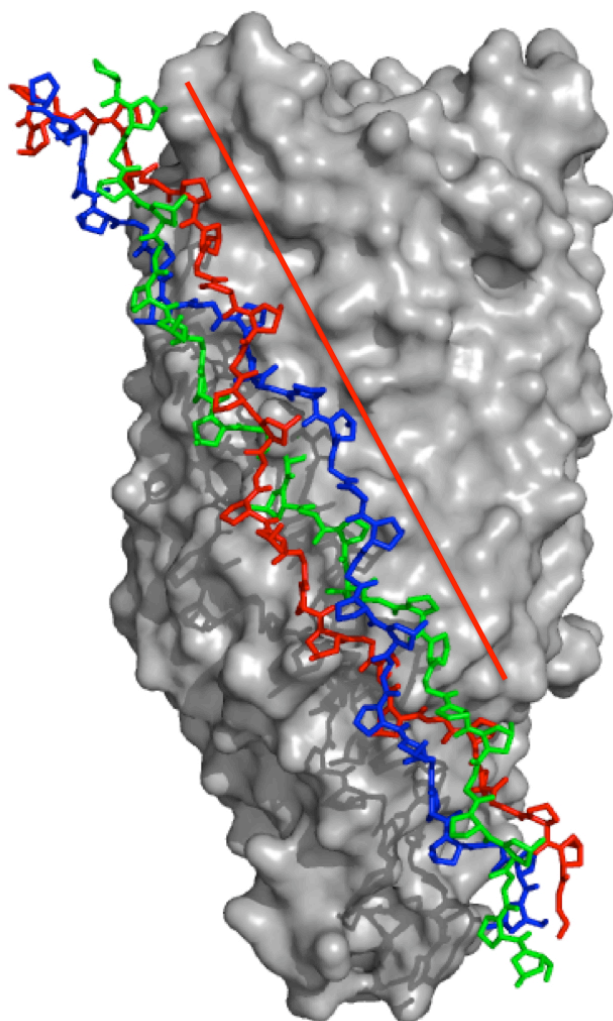

**Supplementary Figure 5.** Model of  $(\text{POG})_{10}$  binding to YadA. The three chains of the peptide are shown in line representation and are coloured differently. The line in red demonstrates the length of the 7 POG repeats that interact with YadA. The model was produced by docking the peptide onto the YadA surface based on mutagenesis data as described in (39).
